# Supplementary material for: Photosynthetic Light Responses May Explain Vertical Distribution of Hymenophyllaceae Species in a Temperate Rainforest of Southern Chile
Source: PLoS One. 2015 Dec 23;10(12):e0145475. doi: 10.1371/journal.pone.0145475 (PMC4699196; doi:10.1371/journal.pone.0145475)
Supplement: S1 Table — (XLSX) [file pone.0145475.s001.xlsx]

## Sheet: Fig 1 PAR freq in the field
Light availability in the field
Figure 1
Range of PAR	9m	9m	9m	9m	Average 9m	4,5m	4,5m	4,5m	4,5m	Average 4,5m		< 1m	< 1m	< 1m	< 1m	Average < 1m
(μmol photons m-2 s-1)	Host 1, counts	Freq %	Host 2, counts	Freq %	%	Host 1, counts	Freq %	Host 2, counts	Freq %	%		Host 1, counts	Freq %	Host 2, counts	Freq %	%
20	1891	48.3755	1778	70.8649	59.6202	3539	89.754	3447	89.3005	89.5273		3870	96.8711	3819	98.9378	97.9045
40	498	12.7398	412	16.4209	14.5804	348	8.82577	382	9.89637	9.36107		53	1.32666	23	0.595855	0.961257
60	331	8.46764	176	7.01475	7.74119	25	0.634035	15	0.388601	0.511318		23	0.57572	6	0.15544	0.36558
80	217	5.55129	89	3.54723	4.54926	6	0.152168	5	0.129534	0.140851		13	0.325407	3	0.0777202	0.201563
100	203	5.19314	18	0.717417	2.95528	7	0.17753	2	0.0518135	0.114672		6	0.150188	3	0.0777202	0.113954
120	153	3.91404	9	0.358709	2.13638	6	0.152168	4	0.103627	0.127898		4	0.100125	0	0	0.0500626
140	133	3.4024	7	0.278996	1.8407	3	0.0760842	3	0.0777202	0.0769022		6	0.150188	2	0.0518135	0.101001
160	113	2.89076	4	0.159426	1.5251	1	0.0253614	0	0	0.0126807		2	0.0500626	0	0	0.0250313
180	91	2.32796	1	0.0398565	1.18391	1	0.0253614	0	0	0.0126807		3	0.0750939	0	0	0.0375469
200	61	1.5605	3	0.11957	0.840035	0	0	0	0	0		2	0.0500626	1	0.0259067	0.0379847
220	28	0.716296	0	0	0.358148	0	0	0	0	0		2	0.0500626	0	0	0.0250313
240	27	0.690714	2	0.079713	0.385213	0	0	0	0	0		2	0.0500626	1	0.0259067	0.0379847
260	43	1.10003	0	0	0.550013	1	0.0253614	0	0	0.0126807		0	0	0	0	0
280	17	0.434894	1	0.0398565	0.237375	0	0	0	0	0		2	0.0500626	0	0	0.0250313
300	16	0.409312	1	0.0398565	0.224584	2	0.0507228	1	0.0259067	0.0383148		0	0	0	0	0
320	12	0.306984	2	0.079713	0.193348	0	0	0	0	0		1	0.0250313	1	0.0259067	0.025469
340	10	0.25582	0	0	0.12791	0	0	0	0	0		0	0	0	0	0
360	9	0.230238	0	0	0.115119	0	0	0	0	0		1	0.0250313	0	0	0.0125156
380	4	0.102328	1	0.0398565	0.0710922	1	0.0253614	0	0	0.0126807		0	0	0	0	0
400	3	0.076746	0	0	0.038373	1	0.0253614	0	0	0.0126807		2	0.0500626	0	0	0.0250313
420	6	0.153492	1	0.0398565	0.0966742	0	0	0	0	0		0	0	0	0	0
440	9	0.230238	2	0.079713	0.154975	0	0	0	0	0		1	0.0250313	0	0	0.0125156
460	6	0.153492	0	0	0.076746	0	0	0	0	0		1	0.0250313	0	0	0.0125156
480	5	0.12791	0	0	0.063955	0	0	0	0	0		0	0	0	0	0
500	4	0.102328	1	0.0398565	0.0710922	0	0	0	0	0		0	0	0	0	0
520	5	0.12791	1	0.0398565	0.0838832	1	0.0253614	0	0	0.0126807		0	0	1	0.0259067	0.0129534
540	2	0.051164	0	0	0.025582	0	0	0	0	0		0	0	0	0	0
560	5	0.12791	0	0	0.063955	1	0.0253614	1	0.0259067	0.0256341		0	0	0	0	0
580	6	0.153492	0	0	0.076746	0	0	0	0	0		0	0	0	0	0
600	1	0.025582	0	0	0.012791	0	0	0	0	0		1	0.0250313	0	0	0.0125156
	3909		2509			3943		3860				3995		3860
